# Supplementary material
Source: PubMed Central journal article supplement (PMC2597512)
Supplement: NIHMS66400-supplement-supplement_1.pdf [file NIHMS66400-supplement-supplement_1.pdf]

Supplementary Fig.1

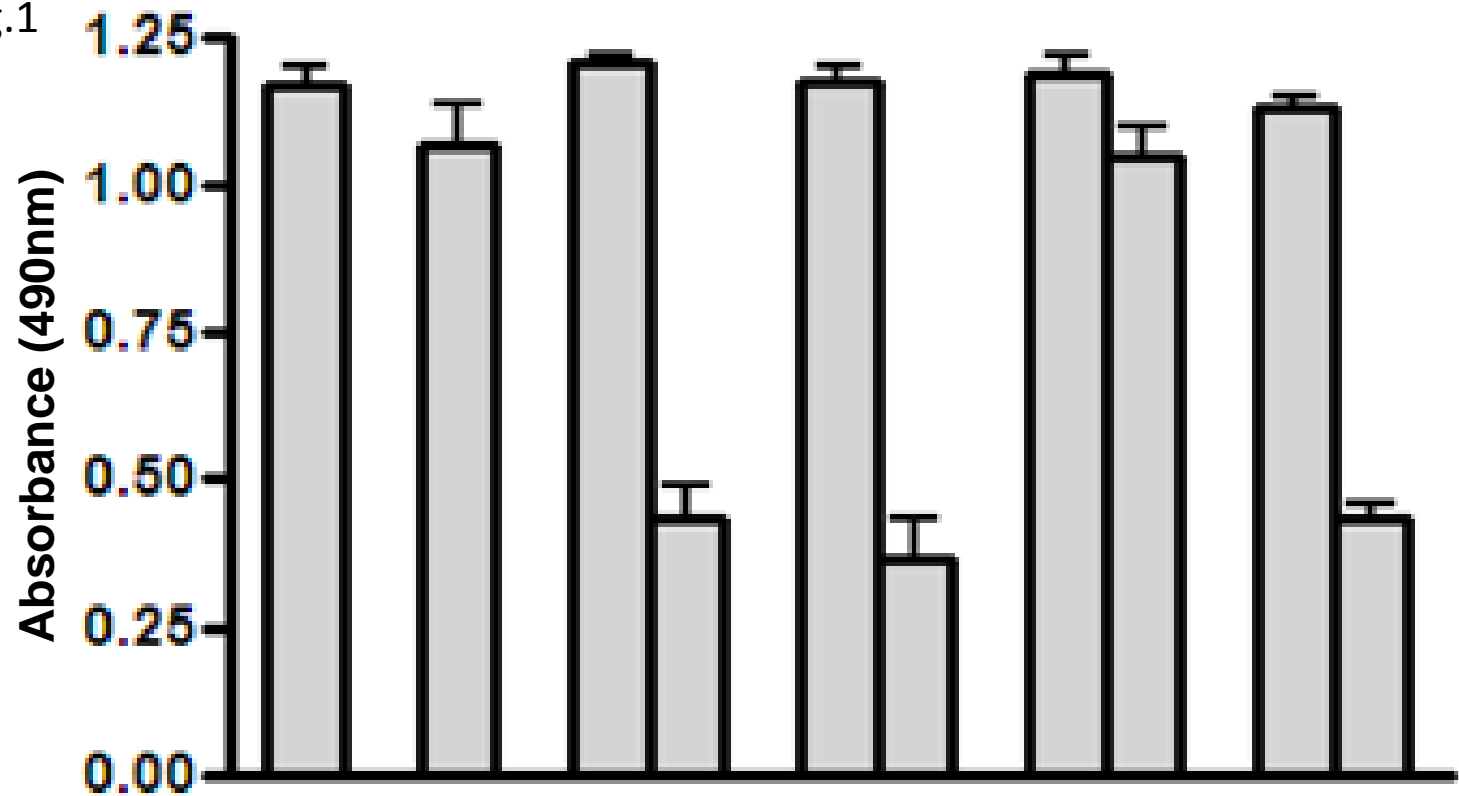

|                   |   |   |   |   |   |   |   |   |   |   |
|-------------------|---|---|---|---|---|---|---|---|---|---|
| PRP-4 shRNA       | - | + | - | + | - | + | - | + | - | + |
| Paclitaxel 0.1µM  | + | - | + | + | - | - | - | - | - | - |
| Doxorubicin 0.5µM | - | - | - | - | + | + | - | - | - | - |
| Vincristine 0.1µM | - | - | - | - | - | - | - | - | + | + |
| Cisplatin 1µM     | - | - | - | - | - | - | + | + | - | - |

**Supplementary Fig.1.** Knockdown PRP-4 with lentiviral shRNA (TRC719) in OVCAR8<sub>TR</sub> reverses drug resistance. OVCAR8<sub>TR</sub> were seeded at a density of at 1.6x10<sup>4</sup> cells per well in a 96-well plate for 24hr. Infected with PRP-4 lentiviral particles on day 2. Cells were then treated with different drugs as indicated for 6 days. Cytotoxicity Assay was performed as described in "Materials and Methods"
